# Supplementary material
Source: Research Square preprint supplement (doi:10.21203/rs.3.rs-9212005/v1)
Supplement: Supplementary file 1 [file efd476a4271c46dbba423957.docx]

# **Supplementary material**


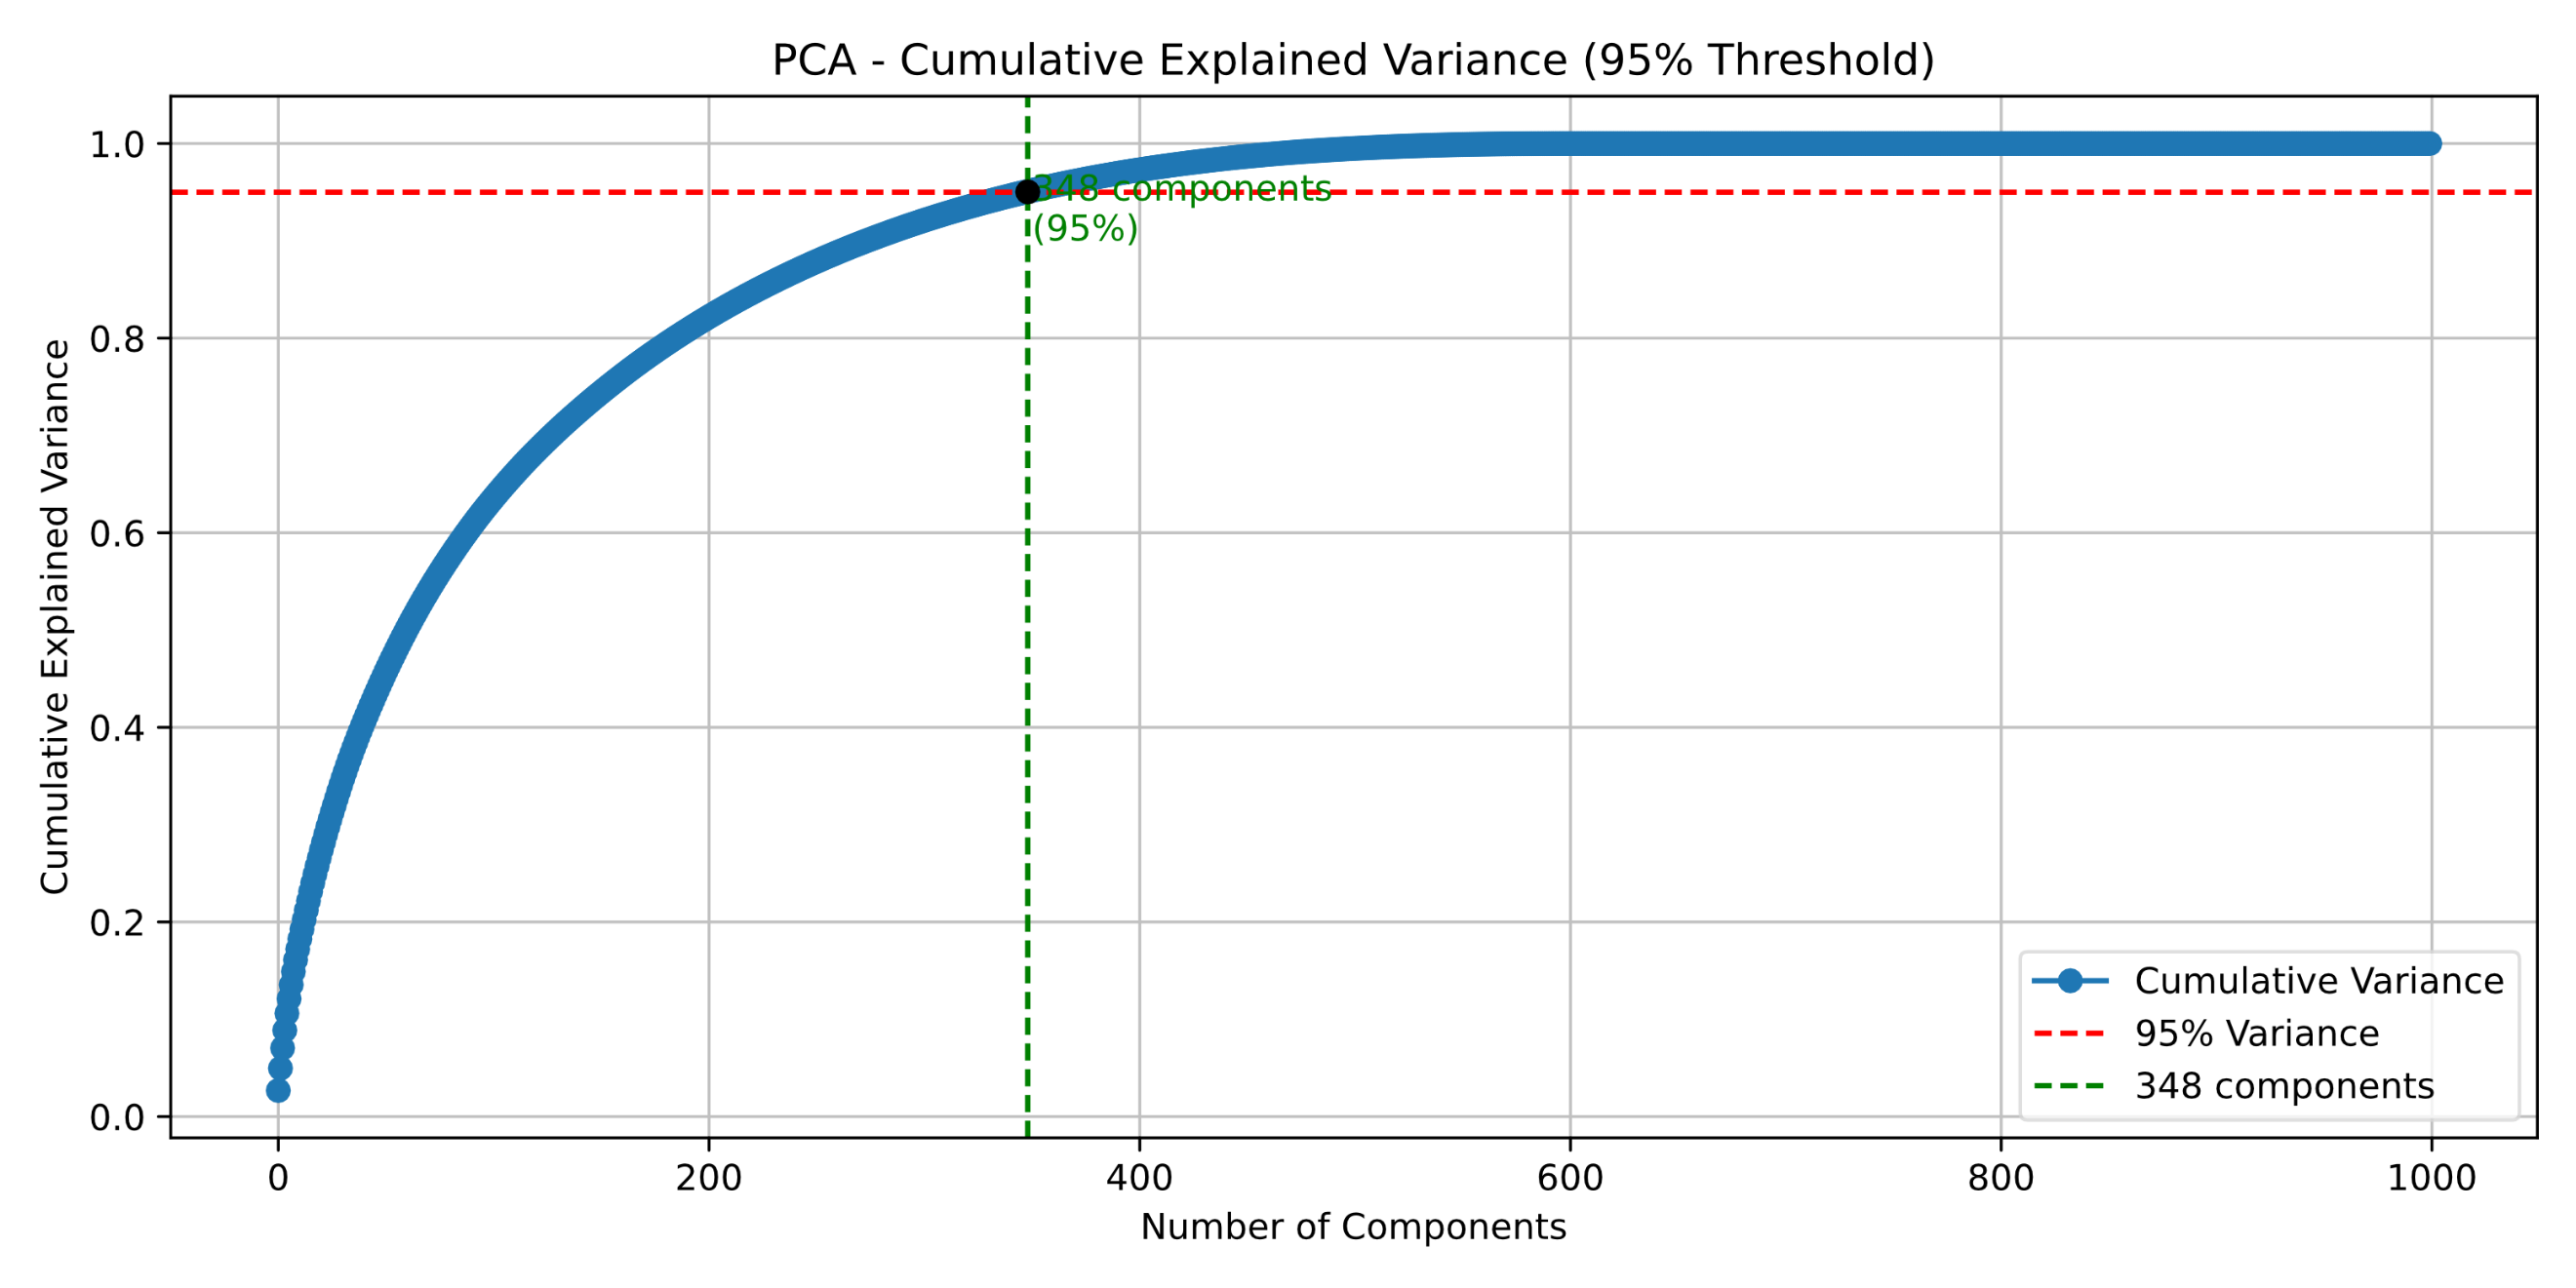


**Figure S1**. Cumulative explained variance obtained by Principal Component Analysis (PCA). The dashed red line indicates the 95% threshold of the total explained variance, while the dashed green line marks the cutoff point corresponding to 348 principal components, sufficient to preserve 95% of the variance in the data. The blue curve represents the cumulative explained variance as the number of components increases.


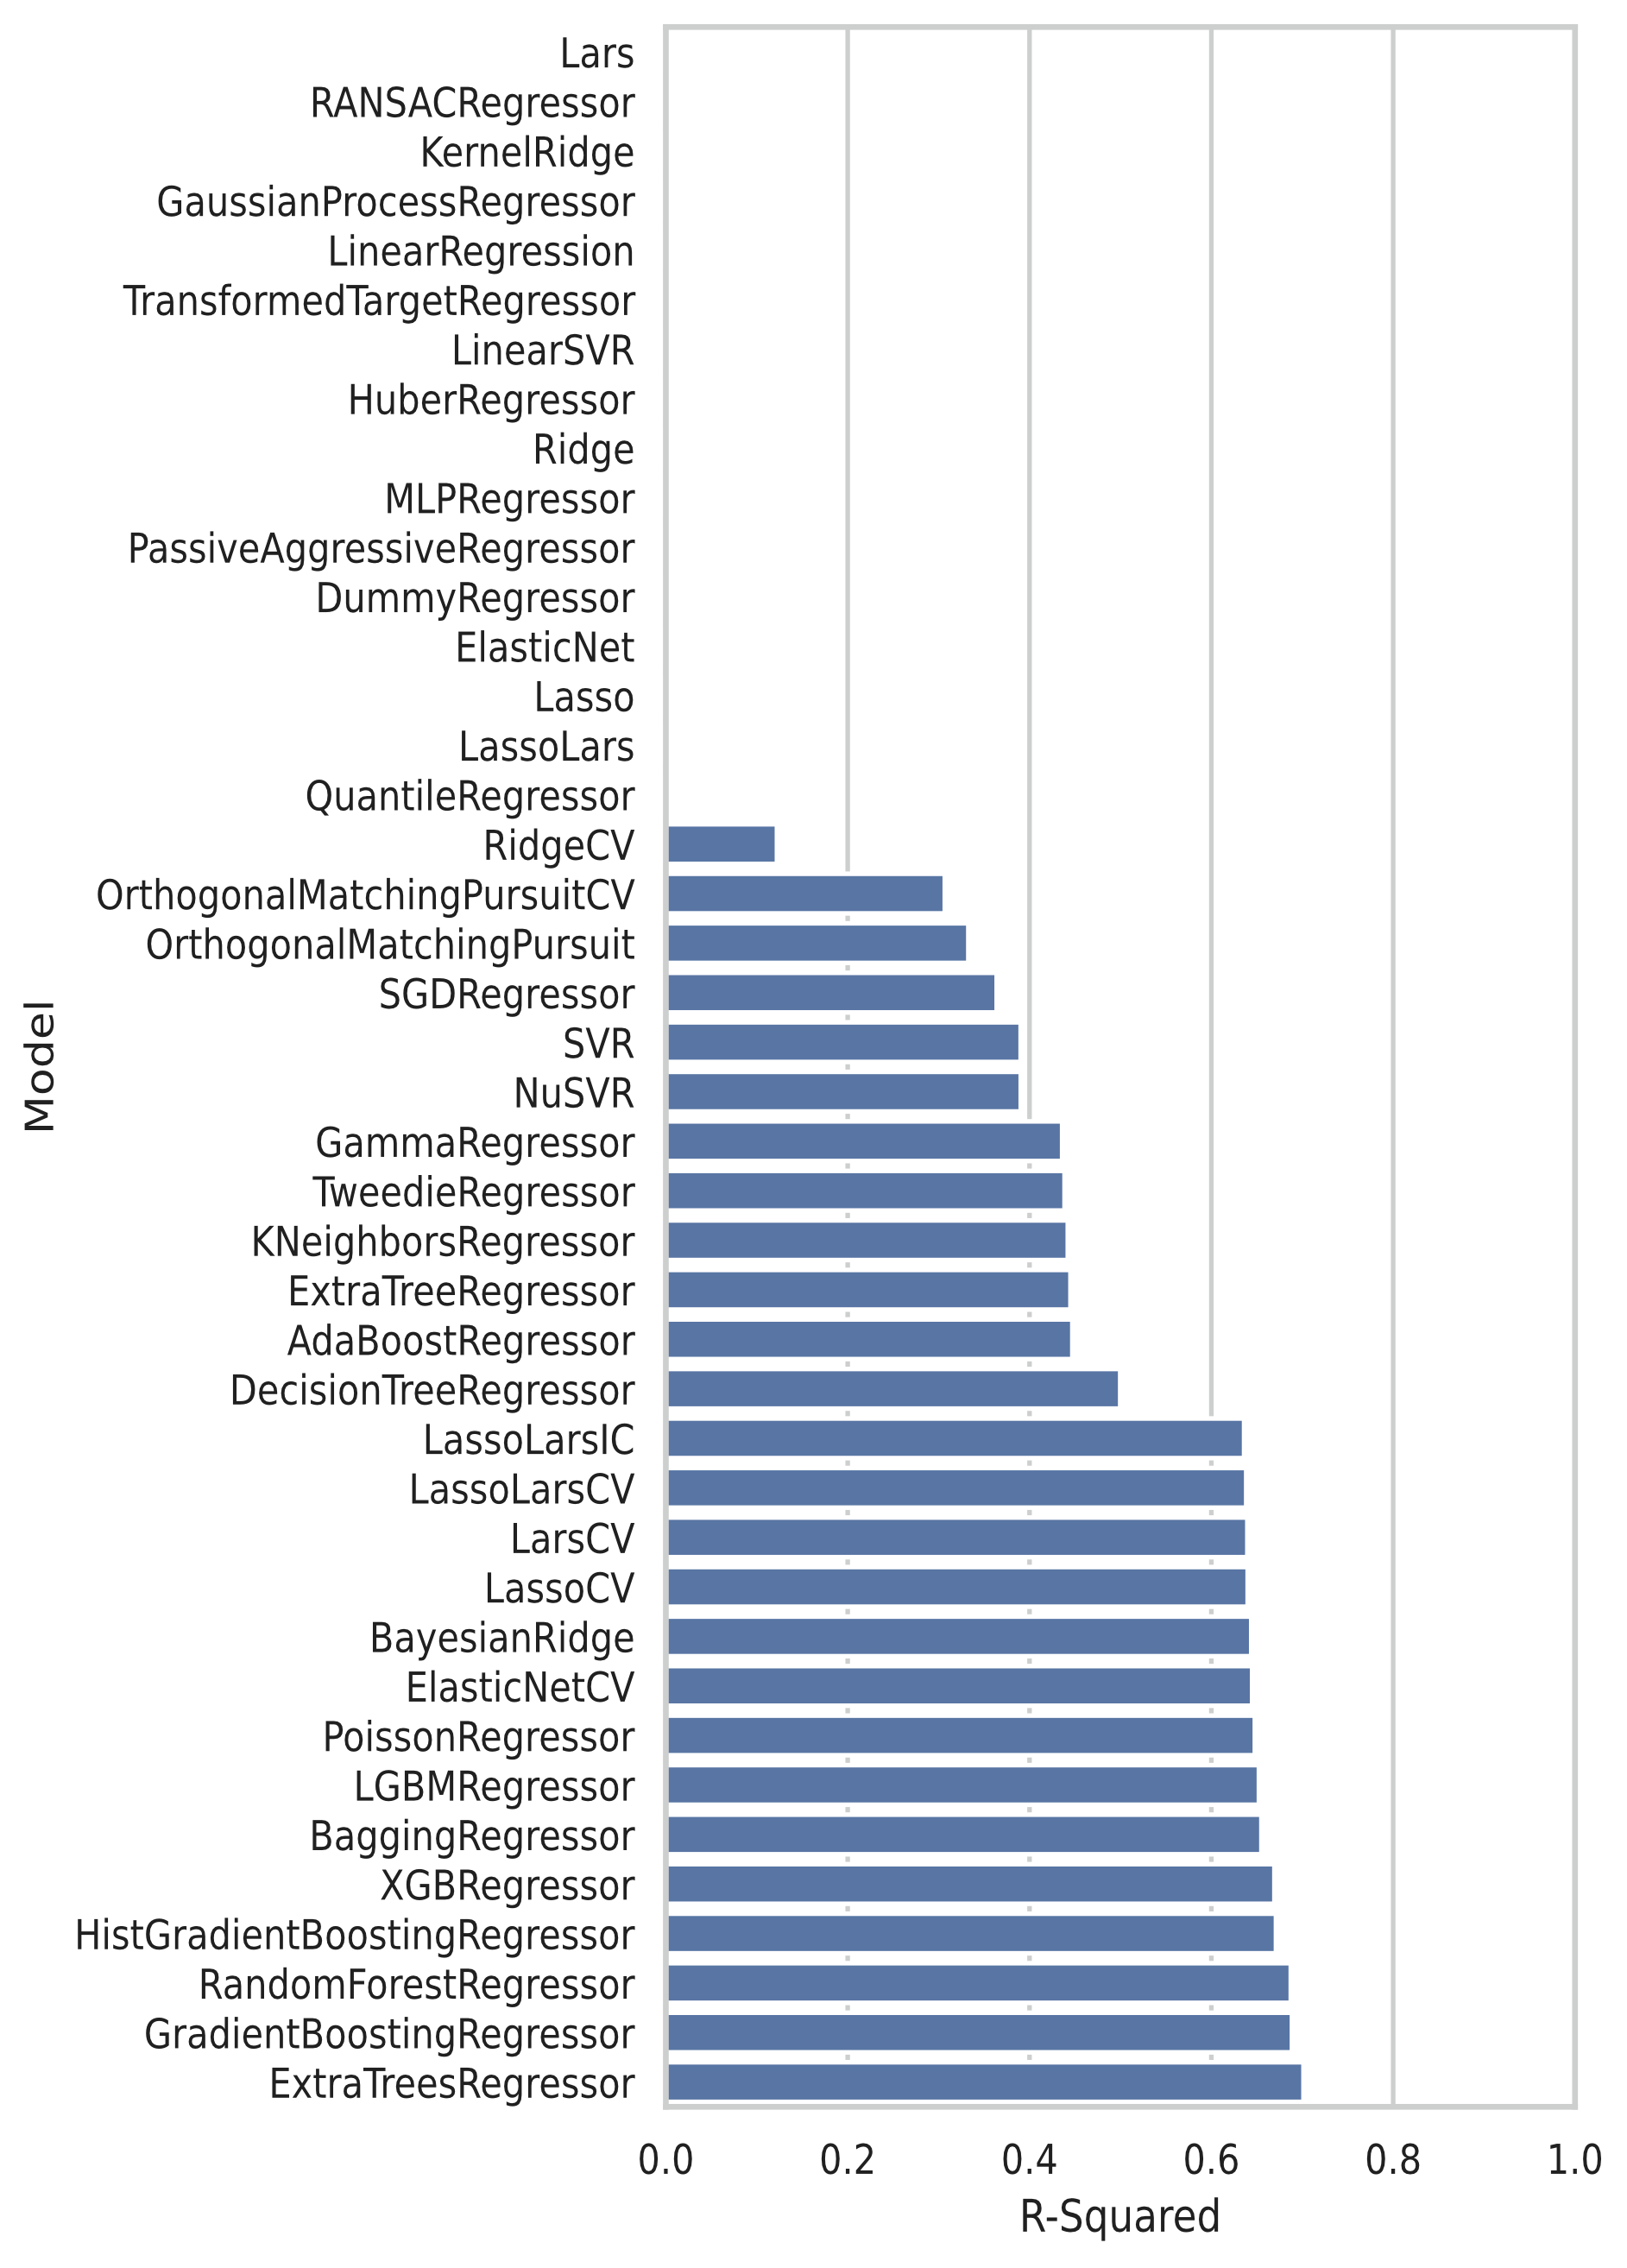


**Figure S2.** Comparative performance of 42 regression models from the LazyPredict package in predicting compound bioactivity against *Candida albicans*.

| PDB ID: 5TZ1 | AutoDockVina 1.2.7 (kcal/mol) | Pyrx 0.8 (kcal/mol) | Mean (kcal/mol) | SD | CV (%) |
| --- | --- | --- | --- | --- | --- |
| Fluconazole | -7.26 | -7.30 | -7.28 | 0.02 | 0.27 |
| ZINC000009470583 | -7.45 | -7.50 | -7.48 | 0.02 | 0.33 |
| ZINC000009470585 | -8.01 | -8.10 | -8.05 | 0.05 | 0.56 |
| ZINC000034020906 | -7.55 | -7.70 | -7.63 | 0.08 | 0.98 |
| ZINC000034020907 | -7.57 | -7.60 | -7.59 | 0.01 | 0.17 |
| ZINC000038289836 | -7.49 | -7.50 | -7.50 | 0.00 | 0.05 |
| ZINC000038289837 | -7.58 | -7.60 | -7.59 | 0.01 | 0.14 |
| ZINC000040844993 | -7.59 | -7.60 | -7.60 | 0.00 | 0.05 |
| ZINC000040844994 | -7.47 | -7.50 | -7.49 | 0.01 | 0.17 |
| ZINC000103237407 | -7.48 | -7.50 | -7.49 | 0.01 | 0.13 |
| ZINC000103237409 | -7.49 | -7.50 | -7.49 | 0.01 | 0.08 |
| ZINC000141515017 | -6.85 | -6.90 | -6.87 | 0.03 | 0.39 |
| ZINC000141515219 | -7.01 | -7.00 | -7.01 | 0.01 | 0.09 |
| ZINC000196183247 | -6.77 | -7.00 | -6.89 | 0.11 | 1.64 |
| ZINC000196183259 | -6.84 | -7.30 | -7.07 | 0.23 | 3.23 |
| ZINC000299869729 | -8.14 | -8.30 | -8.22 | 0.08 | 0.97 |
| ZINC000299869730 | -8.12 | -8.50 | -8.31 | 0.19 | 2.30 |
| ZINC000504084519 | -7.53 | -7.50 | -7.51 | 0.01 | 0.17 |
| ZINC000504084521 | -7.53 | -7.60 | -7.57 | 0.03 | 0.46 |

**Table S1** summarizes the predicted binding affinities of fluconazole and selected ZINC compounds against *Candida albicans* lanosterol 14α-demethylase (CYP51, PDB ID: 5TZ1), calculated using AutoDock Vina 1.2.7 implemented in PyRx 0.8. Among the screened compounds, ZINC000299869729 and ZINC000299869730 exhibited the strongest binding affinities (−8.22 and −8.31 kcal/mol, respectively), outperforming fluconazole (−7.28 kcal/mol). The table reports individual docking scores, mean binding energy, standard deviation (SD), and coefficient of variation (CV).

| PDB ID: 1EQP | AutoDockVina 1.2.7 (kcal/mol) | Pyrx 0.8 (kcal/mol) | Mean (kcal/mol) | SD | CV (%) |
| --- | --- | --- | --- | --- | --- |
| Fluconazole | -8.30 | -8.63 | -8.47 | 0.17 | 1.97 |
| ZINC000009470583 | -8.10 | -8.12 | -8.11 | 0.01 | 0.14 |
| ZINC000009470585 | -8.10 | -8.06 | -8.08 | 0.02 | 0.27 |
| ZINC000034020906 | -8.80 | -8.77 | -8.79 | 0.02 | 0.17 |
| ZINC000034020907 | -8.60 | -8.58 | -8.59 | 0.01 | 0.11 |
| ZINC000038289836 | -8.30 | -8.26 | -8.28 | 0.02 | 0.25 |
| ZINC000038289837 | -8.80 | -8.77 | -8.78 | 0.02 | 0.20 |
| ZINC000040844993 | -9.20 | -9.21 | -9.21 | 0.01 | 0.06 |
| ZINC000040844994 | -8.40 | -8.36 | -8.38 | 0.02 | 0.25 |
| ZINC000103237407 | -8.40 | -8.43 | -8.42 | 0.02 | 0.20 |
| ZINC000103237409 | -8.80 | -8.78 | -8.79 | 0.01 | 0.11 |
| ZINC000141515017 | -7.80 | -7.79 | -7.80 | 0.00 | 0.04 |
| ZINC000141515219 | -8.20 | -8.14 | -8.17 | 0.03 | 0.35 |
| ZINC000196183247 | -7.80 | -7.77 | -7.79 | 0.01 | 0.19 |
| ZINC000196183259 | -8.00 | -7.98 | -7.99 | 0.01 | 0.15 |
| ZINC000299869729 | -9.40 | -9.25 | -9.32 | 0.08 | 0.82 |
| ZINC000299869730 | -9.20 | -9.11 | -9.15 | 0.05 | 0.52 |
| ZINC000504084519 | -8.70 | -8.66 | -8.68 | 0.02 | 0.24 |
| ZINC000504084521 | -8.90 | -8.83 | -8.86 | 0.04 | 0.41 |

**Table S2** summarizes the binding energies (kcal/mol) of fluconazole and selected ZINC compounds docked against the target protein (PDB ID: 1EQP) using AutoDock Vina 1.2.7 implemented in PyRx 0.8. The table presents individual docking scores, mean binding energy ± standard deviation (SD), and coefficient of variation (CV%). Several compounds, notably ZINC000299869729 and ZINC000299869730, exhibited stronger binding affinities than fluconazole.
